# Supplementary material for: CO 2 and CH 4 budgets and global warming potential modifications in Sphagnum -dominated peat mesocosms invaded by Molinia caerulea
Source: Copernicus journal article supplement (doi:10.5194/bg-2019-82), 2019-03-12
Supplement: Supplementary file 1 [file bg-2019-82-supplement.pdf]

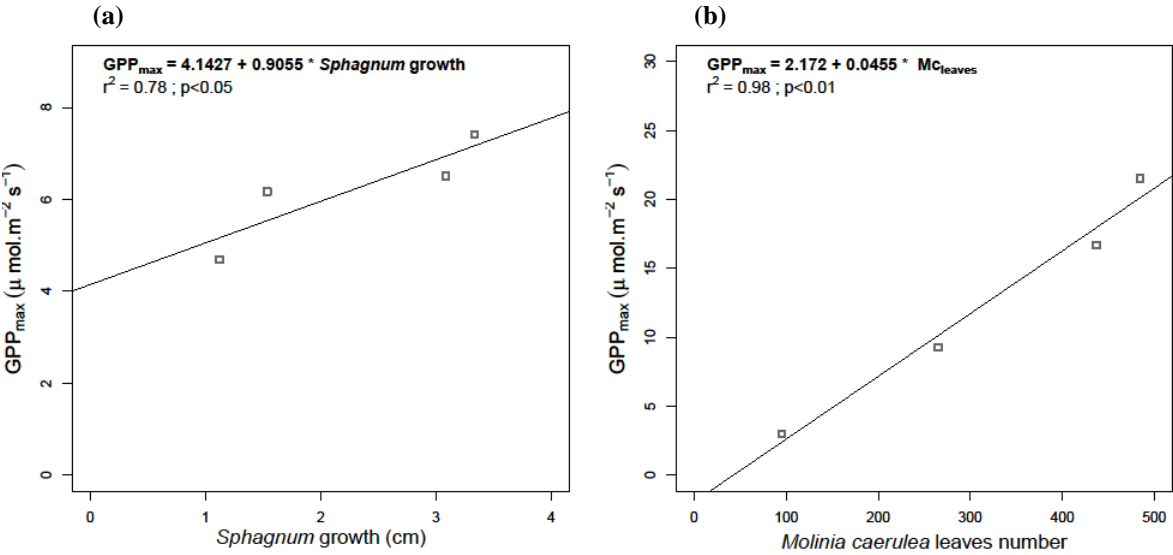

Figure S1: Linear relationship between the Gross Primary Production maximum (GPPmax) calculated with the photosynthesis-irradiance curve and *Sphagnum* growth (a) and the number of *Molinia caerulea* leaves (b).

5 Table S1: Linear regression coefficient of determination (r<sup>2</sup>) between Ecosystem Respiration (ER), Gross Primary Production (GPP) and methane emissions (CH<sub>4</sub>) measurements with air (Ta) and soil temperature (Ts) at 5 and 20 cm depth, water table level (WTL), photosynthetic active radiation (PAR) and the number of *Molinia caerulea* leaves (N=52) . The number in bold is the highest determination coefficient for each variable in *Sphagnum* and *Sphagnum* + *Molinia* plots. Significance levels of correlation are expressed as <sup>-/+</sup>p < 0.05, <sup>-/+</sup>p < 0.01, <sup>---/+++</sup>p < 0.001. <sup>-/+</sup> represents a  
10 negative or positive relationship, respectively.

|                                | Determination coefficient (r <sup>2</sup> ) |                            |                            |                                  |                            |                            |
|--------------------------------|---------------------------------------------|----------------------------|----------------------------|----------------------------------|----------------------------|----------------------------|
|                                | <i>Sphagnum</i>                             |                            |                            | <i>Sphagnum</i> + <i>Molinia</i> |                            |                            |
|                                | ER                                          | GPP                        | CH <sub>4</sub>            | ER                               | GPP                        | CH <sub>4</sub>            |
| Ta                             | <b>0.73</b> <sup>+++</sup>                  | <b>0.31</b> <sup>---</sup> | 0                          | <b>0.51</b> <sup>+++</sup>       | 0.16 <sup>--</sup>         | 0.09 <sup>+</sup>          |
| Ts at 5 cm                     | 0.65 <sup>+++</sup>                         | 0.19 <sup>--</sup>         | 0.25 <sup>+++</sup>        | 0.39 <sup>+++</sup>              | 0.15 <sup>-</sup>          | 0.62 <sup>+++</sup>        |
| Ts at 20 cm                    | 0.47 <sup>+++</sup>                         | 0.18 <sup>--</sup>         | 0.18 <sup>++</sup>         | 0.40 <sup>+++</sup>              | 0.28 <sup>-</sup>          | <b>0.73</b> <sup>+++</sup> |
| WTL                            | 0.55 <sup>---</sup>                         | 0.12 <sup>+</sup>          | <b>0.47</b> <sup>---</sup> | 0.28 <sup>---</sup>              | 0.11 <sup>+</sup>          | 0.12 <sup>-</sup>          |
| PAR                            | 0.48 <sup>+++</sup>                         | 0.28 <sup>---</sup>        | 0.15 <sup>++</sup>         | 0.28 <sup>+++</sup>              | 0.06                       | 0.31 <sup>+++</sup>        |
| <i>Molinia caerulea</i> leaves | NA                                          | NA                         | NA                         | 0.44 <sup>+++</sup>              | <b>0.80</b> <sup>---</sup> | 0.08 <sup>+</sup>          |
